# Supplementary material for: Three-Dimensional (3D) Printed Microneedles for Microencapsulated Cell Extrusion
Source: MDPI journal article supplement (doi:10.3390/bioengineering5030059), 2018-07-31
Supplement: s1 [file s1]

**Three-Dimensional (3D) Printed Microneedles for Microencapsulated Cell Extrusion**

**Chantell Farias <sup>1</sup>, Roman Lyman <sup>1</sup>, Cecilia Hemingway <sup>1</sup>, Huong Chau <sup>1</sup>, Anne Mahacek <sup>2</sup>, Evangelia Bouzos <sup>1</sup> and Maryam Mobed-Miremadi <sup>1,\*</sup>**

<sup>1</sup> Department of Bioengineering, Santa Clara University, Santa Clara, CA 95053-0583, USA; cfarias@scu.edu (C.F.); rlyman@scu.edu (R.L.); chemingway@scu.edu (C.H.); hchau@scu.edu (H.C.); ebouzos@scu.edu (E.B.)

<sup>2</sup> SCU Maker Lab, Santa Clara University, Santa Clara, CA 95053-0583, USA; amahacek@scu.edu (A.M.)

\* Correspondence: mmobedmiremadi@scu.edu; Tel.: +408-554-2731

**Table S1.** Diseases and compounds delivered using MN transdermal delivery.

| Disease          | Compound(s) delivered                                                                                 | Method                                                                                         | MN dimensions                                                                                                                                                                | Study              |
|------------------|-------------------------------------------------------------------------------------------------------|------------------------------------------------------------------------------------------------|------------------------------------------------------------------------------------------------------------------------------------------------------------------------------|--------------------|
| Melanoma         | pH-sensitive dextran nanoparticles (NPs) loaded with anti-PD1 antibody, GOx                           | HA-based transdermal MN array integrated with NPs                                              | 15 × 15 array of conical MNs of 600 µm height, 300 µm base diameter, sharp tip tapering to 5 µm radius of curvature in 600 µm tip-to-tip spacing in 81 mm <sup>2</sup> patch | Wang, et al. [2]   |
| Melanoma         | Tumor lysate, melanin                                                                                 | Infrared-irradiated, tip-methacrylated, HA-based MN array loaded with tumor lysate and melanin | 15 × 15 array of conical MNs of 800 µm height, 300 µm base thickness, sharp tip tapering to 5 µm in 81 mm <sup>2</sup> patch                                                 | Ye, Y., et al. [3] |
| Type I Diabetes  | Glucose-responsive polymeric vesicles (PVs) loaded with insulin, glucose oxidase (GOx)                | Hyaluronic acid (HA) based transdermal MN array integrated with PVs                            | 20 × 20 array of conical MNs of 600 µm height, 600 µm tip- to-tip spacing in 100 mm <sup>2</sup> patch                                                                       | Hu, et al. [4]     |
| Type II Diabetes | Exendin-4 (Ex-4) hormone for glycaemic control                                                        | Dissolving MNs encapsulated with Ex-4                                                          | 3 × 3 array of conical MNs of 450 µm height, 35 µm tip diameter                                                                                                              | Lahiji, et al. [5] |
| Hepatitis B      | Cationic liposomes encapsulated with hepatitis B DNA vaccine VR-E2E and adjuvant CpG oligonucleotides | Polyvinylpyrrolidone (PVP-K17) dissolving MN array loaded with cationic liposomes              | 6 × 6 array of tetrahedral MNs of 650 µm height, 250 µm base length, 450 µm tip-to-tip spacing in 36 mm <sup>2</sup> patch                                                   | Qiu, et al. [6]    |
| Tetanus          | Unadjuvanted tetanus toxoid for vaccination                                                           | MN array formed by casting vaccine solution (PVA, sucrose, CMC in                              | 10 × 10 array of conical MNs of                                                                                                                                              | Esser, et al. [7]  |

|                                        |                                                                                                               |                                                                                                    |                                                                                                                                                                    |                               |
|----------------------------------------|---------------------------------------------------------------------------------------------------------------|----------------------------------------------------------------------------------------------------|--------------------------------------------------------------------------------------------------------------------------------------------------------------------|-------------------------------|
|                                        |                                                                                                               | dibasic potassium phosphate buffer pH 7.4) containing tetanus toxoid monobulk                      | 650 $\mu\text{m}$ height, 250 $\mu\text{m}$ base diameter                                                                                                          |                               |
| Human Papilloma Virus warts            | Bleomycin                                                                                                     | Polylactic Acid-based, Bleomycin tip-coated MN array                                               | 10 $\times$ 10 array of pyramidal MNs of 650 $\mu\text{m}$ height, 250 $\mu\text{m}$ base diameter, in 49 $\text{mm}^2$ patch                                      | Ryu, et al. [8]               |
| Human Papilloma Virus positive cancers | Cationic liposomal HPV E7 <sub>43-63</sub> synthetic long peptide vaccine for host anti-tumor immune response | Silica capillary based single hollow MN and digitally controlled injection system (DC-hMN-iSystem) | Fused silica capillary of length 400 $\mu\text{m}$ , 50 $\mu\text{m}$ inner lumen diameter, 149 $\mu\text{m}$ lumen diameter at tip, 66 $\mu\text{m}$ bevel length | Maaden, et al. [9]            |
| Breast cancer                          | Tamoxifen, Gemcitabine chemotherapeutic agents                                                                | Zein-based MN array coated with Tamoxifen or Gemcitabine, poke and patch administration            | 6 $\times$ 6 array of conical MNs of height and width $965 \pm 23$ and $363 \pm 15$ $\mu\text{m}$ , respectively                                                   | Bhatnagar, et al. [10]        |
| HPV-induced Cervical cancer            | NPs containing RALA-E6/E7 proteins for DNA vaccination                                                        | Polymeric polyvinylpyrrolidone (PVP)-based MN loaded with RALA-E6/E7 NPs                           | 19 $\times$ 19 array of conical MNs of 600 $\mu\text{m}$ height, 300 $\mu\text{m}$ base width, and 300 $\mu\text{m}$ interspacing                                  | Ali, et al. [11]              |
| Neonatal sepsis infection              | Gentamicin (GEN)                                                                                              | PVA, PVP. PEG-based dissolving MN array containing GEN                                             | 19 $\times$ 19 array of pyramidal MN of 500 $\mu\text{m}$ height and 0.45 $\text{cm}^2$ area                                                                       | González-Vázquez, et al. [12] |
| Mycobacterium Tuberculosis             | Bacillus Calmette–Guerin polysaccharide nucleic acid (BCG-PSN) powder                                         | BCG-PSN powder-laden sodium HA-based MN patch                                                      | 6 $\times$ 9 array of conical MN of 200 $\mu\text{m}$ height and 100 $\mu\text{m}$ base diameter                                                                   | Yan, et al. [13]              |
| Obesity                                | Rosiglitazone (Rosi) browning agent, GOx, catalase encapsulated in NPs                                        | Rosi NP-embedded and HA-based MN patch                                                             | 11 $\times$ 11 array of conical MN of 800 $\mu\text{m}$ height, 300 $\mu\text{m}$ base diameter, 600 $\mu\text{m}$ tip-to-tip spacing in 49 $\text{mm}^2$ area     | Zhang, et al. [14]            |
| Osteoporosis                           | Alendronate                                                                                                   | Alendronate tip-coated HA-based dissolving MN array                                                | 190 array of MN of 800 $\mu\text{m}$ height, 40 $\mu\text{m}$ tip diameter,                                                                                        | Katsumi H., et al. [15]       |

|                |                                  |                                           |                                                                                               |                  |
|----------------|----------------------------------|-------------------------------------------|-----------------------------------------------------------------------------------------------|------------------|
| Acute migraine | Dihydroergotamine mesylate (DHE) | DHE-loaded, PVP-based dissolving MN array | 160 $\mu\text{m}$ base diameter<br>10 $\times$ 10 array of conical MN of 1 $\text{cm}^2$ area | Tas, et al. [16] |
|----------------|----------------------------------|-------------------------------------------|-----------------------------------------------------------------------------------------------|------------------|

**Table S2.** MN Manufacturing methods for resorbable (RMN) and hollow (HMN) microneedles.

| Process                                       | Method                                                                                                                                                                                                            | Example Study                 | Fabricated dimensions                                                                                                                                                                |
|-----------------------------------------------|-------------------------------------------------------------------------------------------------------------------------------------------------------------------------------------------------------------------|-------------------------------|--------------------------------------------------------------------------------------------------------------------------------------------------------------------------------------|
| RMN Fabrication                               |                                                                                                                                                                                                                   |                               |                                                                                                                                                                                      |
| Micromolding                                  | Addition drying/photocrosslinking of polymer mixture into PDMS mold fabricated by lithography/etching/thermal drawing techniques                                                                                  | González-Vázquez, et al. [12] | 19 $\times$ 19 array of pyramidal MN of 500 $\mu\text{m}$ height and 0.45 $\text{cm}^2$ area                                                                                         |
| Direct photolithography                       | Polymer casting into PDMS mold, UV exposure, and cross-linking with photocatalyzer                                                                                                                                | Dardano, et al. [30]          | Array of cylindrical MNs of 150 $\mu\text{m}$ height and conical, lancet-shaped MNs of 150 to 2240 $\mu\text{m}$ height                                                              |
| Drawing lithography                           | Polymer is melted, dispensed on a plate, moving up and down to elongate drawn pillars                                                                                                                             | Choi, et al. [31]             | 7 $\times$ 7 array of HA-based conical MN of 350 $\mu\text{m}$ height, 380 $\mu\text{m}$ base diameter, and 30 tip diameter $\mu\text{m}$                                            |
| Solvent casting                               | Drug of interest cast onto PDMS laser-engrafted mold and dried under vacuum, then polymer solution layer cast onto mold, and base plate pasted onto polymer solution after freeze-drying and extraction from mold | Wang, et al. [32]             | 5 $\times$ 5 array of conical MN with height of 600 $\mu\text{m}$ and base diameter 300 $\mu\text{m}$                                                                                |
| Electro-drawing                               | Deformation of PLGA solution sessile drops by application of electrohydrodynamic force, with drug preloaded polymer solution kept at mild temperature                                                             | Ruggiero, et al. [35]         | Arrays of 10 $\times$ 10 cylindrical pillars, of tip-to-tip distance of 1.2 mm, base diameters ranging from 300 $\mu\text{m}$ to 600 $\mu\text{m}$ , and height of 500 $\mu\text{m}$ |
| Continuous liquid interface production (CLIP) | Photoreactive resin photopolymerized on rising platform by Ultra-violet (UV) beam that passes through transparent window at bottom of resin to selectively target and solidify into MNs                           | Johnson, et al. [36]          | Array of square pyramidal MN of 1mm height, 300 $\mu\text{m}$ width                                                                                                                  |
| Droplet-borne air blowing (DAB)               | Polymer drug mixture dispensed as droplet, contacted and drawn for biconcave                                                                                                                                      | Huh, et al. [37]              | 3 $\times$ 3 array of MN, height of 280 $\pm$ 10 $\mu\text{m}$ (epidermal                                                                                                            |

|                      |                                                                                                                                                               |                          |                                                                                                                                                                                                         |
|----------------------|---------------------------------------------------------------------------------------------------------------------------------------------------------------|--------------------------|---------------------------------------------------------------------------------------------------------------------------------------------------------------------------------------------------------|
|                      | shape, then air-dried and separated                                                                                                                           |                          | growth factor MN), $30 \pm 5$ $\mu\text{m}$ (ascorbic acid MN).                                                                                                                                         |
| Dipping              | Polymer-coated pillar tips coated in drug of interest dipped in drug-unmixed solution, then lifted, air-dried, and separated to form MN tips                  | Kim, et al. [38]         | $5 \times 5$ array of conical MN, height of 100 $\mu\text{m}$ and 170 $\mu\text{m}$ diameter                                                                                                            |
| 3D printing          | Formation of 3-dimensional structure from 2-dimensional design by construction methods such as extrusion, sintering, binding                                  | Luzuriaga, et al. [39]   | $5 \times 5$ array of MN of height range 200–2,500 $\mu\text{m}$ , width 400–600 $\mu\text{m}$ , thicknesses 400–600 $\mu\text{m}$ , and tip diameters from 170–220 $\mu\text{m}$                       |
| HMN Fabrication      |                                                                                                                                                               |                          |                                                                                                                                                                                                         |
| Micromolding         | Mold created from a master structure, then creation of replicas through sputtering, deposition, and dissolving of material to form a replica of the structure | Norman, et al. [29]      | Single tapered cylindrical MN of 1.1 mm tall, 225 $\mu\text{m}$ in radius at the base, and 20 $\mu\text{m}$ in radius at the tip                                                                        |
| Mold-based Etching   | Gradual deposition and etching of films onto silicon wafers to create pattern indents for molding                                                             | Kim, et al. [33]         | $13 \times 13$ array of 40 $\mu\text{m}$ in diameter consisting of hollow microneedles of 250 $\mu\text{m}$ in height, 140 $\mu\text{m}$ in base width, 1 mm in pitch, and 40 $\mu\text{m}$ in borehole |
| Lithography          | Silicon wafer coated with photoresist, UV-exposed, then covered with mask to form design                                                                      | Ceyssens, et al. [34]    | $5 \times 5$ array of triangle cylindrical MN; height of 1mm and base of 175 $\mu\text{m}$                                                                                                              |
| Laser micromachining | MN laser-cut from stainless steel sheets                                                                                                                      | Vinayakumar, et al. [40] | $13 \times 13$ array of MN; 1 mm in pitch, 160 $\mu\text{m}$ in base width, approximately 250 $\mu\text{m}$ in height                                                                                   |
| Solvent casting      | Electro-deposition onto PDMS laser-engrafted mold and dried under vacuum, then extraction from mold                                                           | Mansoor, et al. [41]     | Array of 500 $\mu\text{m}$ tall MNs with a tip lumen diameter of 40 $\mu\text{m}$ and tip wall thickness of 15 $\mu\text{m}$                                                                            |

**Table S3.** 3D printed Methods for MN fabrication.

| Process                 | Method                                        | Material                                                                                                                                                                        | Study                   |
|-------------------------|-----------------------------------------------|---------------------------------------------------------------------------------------------------------------------------------------------------------------------------------|-------------------------|
| Vat Photopolymerization | Continuous liquid interface production (CLIP) | Trimethylolpropane Triacrylate                                                                                                                                                  | Johnson, et al. [36]    |
| Extrusion               | Fused Deposition Modeling (FDM™)              | Poly(lactic Acid (PLA)                                                                                                                                                          | Luzuriaga, et al. [39]  |
| Vat Polymerization      | Multiphoton polymerization (MPP)              | Polymer-ceramic hybrid (containing urethane- and thioether (meth)-acrylate alkoxysilanes) byOrmocer, Inc.                                                                       | Ovsianikov, et al. [42] |
| Vat Polymerization      | Stereolithography (SLA)                       | Bovine serum albumin-containing Poly (ethylene glycol) diacrylate (PEGDA) hydrogel                                                                                              | Kang et al. [50]        |
| Vat Polymerization      | SLA                                           | Poly(propylene fumarate)/diethyl fumarate biodegradable photopolymer loaded with dacarbazine                                                                                    | Lu, et al. [51]         |
| Powder Bed Fusion       | Selective Laser Sintering (SLS)               | Biocompatible stainless steel alloy 316L                                                                                                                                        | Gieseke, et al. [52]    |
| Vat Polymerization      | Digital Light Processing (DLP)                | eShell 200 photosensitive acrylate-based biocompatible polymer resin by Envisiontec, Inc.                                                                                       | Miller, et al. [54]     |
| Vat Polymerization      | SLA                                           | R11 acrylate based photopolymer by Envisiontec, Inc.                                                                                                                            | Lacan, et al. [57]      |
| Vat Polymerization      | SLA                                           | Class I photopolymer resin by Formlabs®                                                                                                                                         | Pere, et al. [58]       |
| Vat Polymerization      | SLA                                           | FLGPCL02 photopolymer resin by Formlabs®                                                                                                                                        | Kundu, et al. [112]     |
| Vat Polymerization      | SLA                                           | VisiJet FTX Clear Photocurable resin (50% triethylene glycoldiacrylate, 20% isobornyl methacrylate, 2% phenylbis(2,4,6-trimethyl benzoyl)- phosphine oxide) by 3D Systems, Inc. | Liu, et al. [55]        |
| Vat Polymerization      | DLP                                           | eShell 200 photosensitive acrylate-based biocompatible polymer resin by Envisiontec, Inc.                                                                                       | Boehm, et al. [43]      |
| Vat Polymerization      | DLP                                           | 3DM Cast photopolymer resin by Kudo3D, Inc.                                                                                                                                     | Lim, et al. [44]        |
| Vat Polymerization      | DLP                                           | Photosensitive photoresist                                                                                                                                                      | Faraji Rad, et al. [45] |

**Table S4.** MN geometries.

| Geometry                        | MN dimensions                                                                                                                                                                                                                                  | Array dimensions                                                                                                                | Study                         |
|---------------------------------|------------------------------------------------------------------------------------------------------------------------------------------------------------------------------------------------------------------------------------------------|---------------------------------------------------------------------------------------------------------------------------------|-------------------------------|
| Conical                         | 600 $\mu\text{m}$ height, 300 $\mu\text{m}$ base diameter, sharp tip tapering to 5 $\mu\text{m}$ radius of curvature in 600 $\mu\text{m}$ tip-to-tip spacing                                                                                   | 15 $\times$ 15 array in 81 $\text{mm}^2$ patch                                                                                  | Wang, et al. [2]              |
| Conical                         | 600 $\mu\text{m}$ height, 600 $\mu\text{m}$ tip- to-tip spacing                                                                                                                                                                                | 20 $\times$ 20 array in 100 in 100 $\text{mm}^2$ patch                                                                          | Hu, et al. [4]                |
| Pyramidal                       | 650 $\mu\text{m}$ height, 250 $\mu\text{m}$ base diameter                                                                                                                                                                                      | 10 $\times$ 10 array in 49 $\text{mm}^2$ patch                                                                                  | Ryu, et al. [8]               |
| Pyramidal                       | 500 $\mu\text{m}$ height and 0.45 $\text{cm}^2$ area                                                                                                                                                                                           | 19 $\times$ 19 array of pyramidal MN of                                                                                         | González-Vázquez, et al. [12] |
| Conical                         | 800 $\mu\text{m}$ height, 300 $\mu\text{m}$ base diameter, 600 $\mu\text{m}$ tip-to-tip spacing                                                                                                                                                | 11 $\times$ 11 array in 49 $\text{mm}^2$ area                                                                                   | Zhang, et al. [14]            |
| Tip-beveled triangular cylinder | 1 mm height, and triangular cross-section and base of 175 $\mu\text{m}$ , 54.74° tip bevel                                                                                                                                                     | 5 $\times$ 5 array                                                                                                              | Ceyssens, et al. [34]         |
| Cylindrical body, pointed head  | Cylindrical base of 700 $\mu\text{m}$ in length, conical tip of 300 $\mu\text{m}$ in length; 20 $\mu\text{m}$ diameter of the apex of the cone, 200 $\mu\text{m}$ base diameter. 0.58 $\text{mm}^2$ surface area and 0.33 $\text{mm}^3$ volume | 25 MN where individual microneedles had a 2 $\times$ 2 mm substrate with a thickness of 300 $\mu\text{m}$                       | Lu, et al. [51]               |
| Triangularly-sloped             | Triangular base with 1.2 mm sides, height of 1.5 mm, and vertical cylindrical channel of diameter 400 $\mu\text{m}$ (hollow)                                                                                                                   | 2 $\times$ 2 array with 2 mm inter-needle spacing                                                                               | Miller, et al. [54]           |
| Cylindrical                     | Inner diameter 160 $\mu\text{m}$ , outer diameter 220 $\mu\text{m}$ , height 900 $\mu\text{m}$ (hollow)                                                                                                                                        | 4 $\times$ 4 array in 4 $\text{mm}^2$ patch                                                                                     | Liu, et al. [55]              |
| Cylindrical body, pointed head  | First design: 700 $\mu\text{m}$ total height, 150 $\mu\text{m}$ tip height, 150 $\mu\text{m}$ flange height;<br>Second design: 700 $\mu\text{m}$ total height, 350 $\mu\text{m}$ tip height, 150 $\mu\text{m}$ flange height.                  | First design: 16 microneedle array (2.17 mm $\times$ 2.17 mm)<br>Second design: 16 microneedle array (2.17 mm $\times$ 2.17 mm) | Faraji Rad, et al. [45]       |
| Cylindrical body, pointed head  | Body: 400 $\mu\text{m}$ in height, 300 $\mu\text{m}$ in diameter<br>Tip: 100 $\mu\text{m}$ height                                                                                                                                              | 6 $\times$ 6 array with 1 mm inter-needle spacing                                                                               | Nagamine, et al. [56]         |
| Tip-beveled cylinder            | 2 mm height, 60 $\mu\text{m}$ inner diameter and 100 m outer diameter, laser-cut 30° and 60° bevel angles                                                                                                                                      | Single needle for blood extraction                                                                                              | Lee, et al. [59]              |
| Tip-beveled cylinder            | 980 $\mu\text{m}$ height, 300 $\mu\text{m}$ wide shaft; 590 $\mu\text{m}$ distance between lumen opening and baseplate; 150 $\mu\text{m}$ diameter of the lumen opening                                                                        | 6 $\times$ 6 array with 900 $\mu\text{m}$ spacing between MN                                                                    | Wang, et al. [60]             |

|                    |                                                           |                                                              |                        |
|--------------------|-----------------------------------------------------------|--------------------------------------------------------------|------------------------|
| Pyramidal          | 500 $\mu\text{m}$ height, 300 $\mu\text{m}$ base diameter | 8 $\times$ 8 array with 500 $\mu\text{m}$ spacing between MN | Lau, et al.<br>[61]    |
| Tetrahedron-shaped | 500 $\mu\text{m}$ in height (produced by Elegaphy, Inc.)  | 3 $\times$ 9 array                                           | Nguyen, et al.<br>[62] |

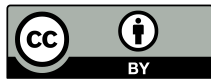

© 2018 by the authors. Submitted for possible open access publication under the terms and conditions of the Creative Commons Attribution (CC BY) license (<http://creativecommons.org/licenses/by/4.0/>).
